# Supplementary material for: Hyperbaric Oxygen Preconditioning Can Reduce Postabdominoplasty Complications: A Retrospective Cohort Study
Source: PubMed Central journal article supplement — Plast Reconstr Surg Glob Open. 2019 Oct 31;7(10):e2417. doi: 10.1097/GOX.0000000000002417 (PMC6846320; doi:10.1097/gox.0000000000002417), 2019-10-31
Supplement: gox-7-e2417-s001.pdf [file gox-7-e2417-s001.pdf]

**SDC 1:** Preoperative characteristics of the matched groups

|                                        | HBOT before surgery |                     | p      |
|----------------------------------------|---------------------|---------------------|--------|
|                                        | No                  | Yes                 |        |
| <b>Patient characteristics</b>         | <b>No (n = 63)</b>  | <b>Yes (n = 63)</b> |        |
| Age (years), mean (SD)                 | 44.22 (8.01)        | 42.95 (7.35)        | 0.277  |
| Smoking, n (%)                         | 13 (20.6%)          | 20 (31.7%)          | 0.248  |
| Regular sporting activity, n (%)       | 23 (36.5%)          | 23 (36.5%)          | >0.999 |
| Bariatric surgery, n (%)               | 14 (22.2%)          | 19 (30.2%)          | 0.359  |
| Abdominoplasty, n (%)                  | 39 (61.9%)          | 43 (68.3%)          | 0.597  |
| Lower body lift, n (%)                 | 24 (38.1%)          | 20 (31.7%)          | 0.597  |
| Liposuction, n (%)                     | 49 (77.8%)          | 56 (88.9%)          | 0.167  |
| BMI (kg/m <sup>2</sup> ), mean (SD)    |                     |                     |        |
| Maximal                                | 31.77 (7.23)        | 32.98 (7.14)        | 0.23   |
| Minimal                                | 23.98 (3.43)        | 24.15 (4.10)        | 0.787  |
| Current                                | 24.93 (3.30)        | 25.28 (3.89)        | 0.578  |
| Maximal weight loss (kg), median (IQR) | 23 (1–32)           | 28 (7–36)           | 0.357  |
| Current weight (kg), mean (SD)         | 67.27 (9.90)        | 67.78 (11.68)       | 0.8    |
| Current weight loss (kg), median (IQR) | 20 (0–30)           | 24 (5–33)           | 0.361  |
| Comorbidity, n (%)                     |                     |                     |        |
| Hypertension                           | 5 (7.9%)            | 1 (1.6%)            | 0.219  |
| Cardiovascular                         | 0 (0%)              | 1 (1.6%)            | >0.999 |
| Thyroid disease                        | 7 (11.1%)           | 6 (9.5%)            | >0.999 |

|                   |           |          |        |
|-------------------|-----------|----------|--------|
| Asthma            | 1 (1.6%)  | 3 (4.8%) | 0.625  |
| Diabetes mellitus | 4 (6.3%)  | 4 (6.3%) | >0.999 |
| Oncology          | 1 (1.6%)  | 1 (1.6%) | >0.999 |
| Mental disorder   | 9 (14.3%) | 3 (4.8%) | 0.146  |

---

HBOT: hyperbaric oxygen therapy, SD: standard deviation, IQR: interquartile range.
